# Supplementary material for: Access to primary care and the route of emergency admission to hospital: retrospective analysis of national hospital administrative data
Source: PubMed Central journal article supplement (PMC4893129; doi:10.1136/bmjqs-2015-004338), 2015-08-25
Supplement: bmjqs-2015-004338-s1.pdf [file bmjqs-2015-004338-s1.pdf]

## Appendix 1 Clinical Classification Software (CCS) groups excluded from the analysis

CCS groups relating to mental health were excluded as the potential relevance of access to primary care to the route of admission was unclear. CCS groups relating to injury and poisoning were excluded as patients are likely to visit an accident and emergency (A&E) department immediately, irrespective of access to their registered general practice.

| CCS group | CCS label                                                    |
|-----------|--------------------------------------------------------------|
|           | <i>Mental health</i>                                         |
| 65        | Mental retardation                                           |
| 66        | Alcohol-related mental disorders                             |
| 67        | Substance-related mental disorders                           |
| 68        | Senility and organic mental disorders                        |
| 69        | Affective disorders                                          |
| 70        | Schizophrenia and related disorders                          |
| 71        | Other psychoses                                              |
| 72        | Anxiety; somatoform; dissociative; and personality disorders |
| 73        | Preadult disorders                                           |
| 74        | Other mental conditions                                      |
| 75        | Personal history of mental disorder                          |
|           | <i>Injury and poisoning</i>                                  |
| 225       | Joint disorders and dislocations; trauma-related             |
| 226       | Fracture of neck of femur (hip)                              |
| 227       | Spinal cord injury                                           |
| 228       | Skull and face fractures                                     |
| 229       | Fracture of upper limb                                       |
| 230       | Fracture of lower limb                                       |
| 231       | Other fractures                                              |
| 232       | Sprains and strains                                          |
| 233       | Intracranial injury                                          |
| 234       | Crushing injury or internal injury                           |
| 235       | Open wounds of head; neck; and trunk                         |
| 236       | Open wounds of extremities                                   |
| 237       | Complication of device; implant; or graft                    |
| 238       | Complication of surgical procedures or medical care          |
| 239       | Superficial injury; contusion                                |
| 240       | Burns                                                        |
| 241       | Poisoning by psychotropic drugs                              |
| 242       | Poisoning by other medications and drugs                     |
| 243       | Poisoning by nonmedicinal substances                         |
| 244       | Other injuries and conditions due to external causes         |
| 253       | Allergic reactions                                           |

**Appendix 2** Numbers of A&E admissions and GP admissions in the study population by Clinical Classification Software (CCS) group primary diagnosis

| <b>Rank</b> | <b>CCS group</b> | <b>CCS label</b>          | <b>Number of A&amp;E admissions</b> | <b>Percentage of A&amp;E admissions (%)</b> | <b>Diagnosis risk of A&amp;E admission (%)</b> |
|-------------|------------------|---------------------------|-------------------------------------|---------------------------------------------|------------------------------------------------|
| 1           | 122              | Pneumonia*†               | 112 265                             | 5.9                                         | 84.2                                           |
| 2           | 102              | Nonspecific chest pain    | 104 009                             | 5.5                                         | 91.1                                           |
| 3           | 159              | Urinary tract infections† | 89 947                              | 4.7                                         | 81.7                                           |
| 4           | 127              | COPD†                     | 82 168                              | 4.3                                         | 84.2                                           |
| 5           | 251              | Abdominal pain            | 77 578                              | 4.1                                         | 74.1                                           |

  

| <b>Rank</b> | <b>CCS group</b> | <b>CCS label</b>                        | <b>Number of GP admissions</b> | <b>Percentage of GP admissions (%)</b> | <b>Diagnosis risk of GP admission (%)</b> |
|-------------|------------------|-----------------------------------------|--------------------------------|----------------------------------------|-------------------------------------------|
| 1           | 251              | Abdominal pain                          | 27 159                         | 6.5                                    | 25.9                                      |
| 2           | 122              | Pneumonia*†                             | 21 022                         | 5.0                                    | 15.8                                      |
| 3           | 159              | Urinary tract infections†               | 20 131                         | 4.8                                    | 18.3                                      |
| 4           | 197              | Skin and subcutaneous tissue infections | 15 760                         | 3.8                                    | 25.5                                      |
| 5           | 127              | COPD†                                   | 15 361                         | 3.7                                    | 15.8                                      |

A&E: accident and emergency, COPD: chronic obstructive pulmonary disease, GP: general practitioner  
Fractures of the lower limb (CCS 230): 40 359 admissions (39 960 A&E admissions, 399 GP admissions)

\*Excludes pneumonia caused by tuberculosis or sexually transmitted disease

†Included in subgroup analysis

**Appendix 3** Univariable and multivariable multilevel logistic regression models of associations between the odds of GP admission (versus A&E admission) and patient characteristics in England, 2011-12

|                                               | Unadjusted odds ratio (95% CI) | P value | Adjusted odds ratio (95% CI) | P value |
|-----------------------------------------------|--------------------------------|---------|------------------------------|---------|
| <b>Age (years):</b>                           |                                |         |                              |         |
| 18 to 29                                      | 1                              |         | 1                            |         |
| 30 to 39                                      | 0.93 (0.92 to 0.95)            | <0.001  | 1.04 (1.02 to 1.07)          | <0.01   |
| 40 to 49                                      | 0.89 (0.88 to 0.91)            | <0.001  | 1.02 (1.00 to 1.05)          | 0.08    |
| 50 to 59                                      | 0.84 (0.83 to 0.86)            | <0.001  | 1.03 (1.01 to 1.06)          | <0.05   |
| 60 to 69                                      | 0.89 (0.88 to 0.91)            | <0.001  | 1.05 (1.03 to 1.08)          | <0.001  |
| 70 to 79                                      | 0.86 (0.84 to 0.87)            | <0.001  | 1.04 (1.02 to 1.06)          | <0.001  |
| 80 to 89                                      | 0.84 (0.83 to 0.85)            | <0.001  | 1.01 (0.99 to 1.04)          | 0.21    |
| ≥90                                           | 0.78 (0.77 to 0.79)            | <0.001  | 0.93 (0.91 to 0.96)          | <0.001  |
| <b>Female (versus male)</b>                   | 1.16 (1.15 to 1.17)            | <0.001  | 1.14 (1.13 to 1.15)          | <0.001  |
| <b>Ethnicity:</b>                             |                                |         |                              |         |
| White                                         | 1                              |         | 1                            |         |
| Mixed                                         | 0.66 (0.62 to 0.69)            | <0.001  | 0.97 (0.89 to 1.06)          | 0.51    |
| Asian                                         | 0.48 (0.47 to 0.49)            | <0.001  | 1.03 (1.00 to 1.07)          | 0.09    |
| Black                                         | 0.28 (0.27 to 0.29)            | <0.001  | 0.81 (0.76 to 0.86)          | <0.001  |
| Other                                         | 0.37 (0.35 to 0.38)            | <0.001  | 0.77 (0.72 to 0.82)          | <0.001  |
| Not known                                     | 1.20 (1.19 to 1.22)            | <0.001  | 1.28 (1.25 to 1.32)          | <0.001  |
| <b>Index of Multiple Deprivation rank:</b>    |                                |         |                              |         |
| 1 to 6 497 (most deprived)                    | 1                              |         | 1                            |         |
| 6 498 to 12 993                               | 1.18 (1.17 to 1.19)            | <0.001  | 1.05 (1.03 to 1.07)          | <0.001  |
| 12 994 to 19 490                              | 1.40 (1.38 to 1.41)            | <0.001  | 1.09 (1.07 to 1.11)          | <0.001  |
| 19 491 to 25 986                              | 1.45 (1.43 to 1.46)            | <0.001  | 1.13 (1.10 to 1.15)          | <0.001  |
| 25 987 to 32 482 (least deprived)             | 1.46 (1.44 to 1.47)            | <0.001  | 1.15 (1.12 to 1.17)          | <0.001  |
| <b>Rural area of residence (versus urban)</b> | 1.67 (1.65 to 1.68)            | <0.001  | 1.06 (1.04 to 1.08)          | <0.001  |
| <b>Diagnosis risk of GP admission</b>         | 1.07 (1.07 to 1.07)            | <0.001  | 1.08 (1.08 to 1.08)          | <0.001  |
| <b>Access to general practice (x)*:</b>       |                                |         |                              |         |
| x<80 (least accessible)                       | 0.51 (0.50 to 0.52)            | <0.001  | 0.60 (0.53 to 0.68)          | <0.001  |
| 80≤x<85                                       | 0.69 (0.68 to 0.70)            | <0.001  | 0.73 (0.67 to 0.80)          | <0.001  |
| 85≤x<90                                       | 0.84 (0.83 to 0.85)            | <0.001  | 0.89 (0.83 to 0.95)          | <0.001  |
| 90≤x<95                                       | 1                              |         | 1                            |         |
| 95≤x≤100 (most accessible)                    | 1.17 (1.16 to 1.18)            | <0.001  | 1.12 (1.05 to 1.19)          | <0.001  |
| <b>Day of admission:</b>                      |                                |         |                              |         |
| Sunday                                        | 1                              |         | 1                            |         |
| Monday                                        | 2.12 (2.09 to 2.15)            | <0.001  | 2.18 (2.13 to 2.23)          | <0.001  |
| Tuesday                                       | 2.08 (2.05 to 2.11)            | <0.001  | 2.16 (2.12 to 2.21)          | <0.001  |
| Wednesday                                     | 2.11 (2.08 to 2.14)            | <0.001  | 2.21 (2.16 to 2.26)          | <0.001  |
| Thursday                                      | 2.18 (2.15 to 2.21)            | <0.001  | 2.30 (2.25 to 2.35)          | <0.001  |
| Friday                                        | 2.39 (2.35 to 2.42)            | <0.001  | 2.52 (2.46 to 2.57)          | <0.001  |
| Saturday                                      | 1.10 (1.08 to 1.12)            | <0.001  | 1.11 (1.08 to 1.14)          | <0.001  |
| <b>Region of residence:</b>                   |                                |         |                              |         |
| East Midlands                                 | 1                              |         | 1                            |         |
| East of England                               | 0.88 (0.86 to 0.89)            | <0.001  | 0.69 (0.62 to 0.76)          | <0.001  |
| London                                        | 0.10 (0.09 to 0.10)            | <0.001  | 0.09 (0.08 to 0.10)          | <0.001  |
| North East                                    | 0.94 (0.93 to 0.96)            | <0.001  | 0.85 (0.75 to 0.96)          | <0.05   |
| North West                                    | 0.81 (0.80 to 0.82)            | <0.001  | 0.76 (0.70 to 0.83)          | <0.001  |
| South East                                    | 0.85 (0.84 to 0.86)            | <0.001  | 0.75 (0.69 to 0.82)          | <0.001  |
| South West                                    | 1.45 (1.43 to 1.47)            | <0.001  | 1.34 (1.21 to 1.48)          | <0.001  |
| West Midlands                                 | 0.78 (0.77 to 0.79)            | <0.001  | 0.78 (0.71 to 0.86)          | <0.001  |
| Yorkshire and the Humber                      | 0.87 (0.86 to 0.88)            | <0.001  | 0.89 (0.81 to 0.98)          | <0.05   |

A&E: accident and emergency, GP: general practitioner

Multivariable model also adjusted for month of admission: January (reference), February (odds ratio 0.97), March (0.98), April (1.05), May (1.10), June (1.12), July (1.12), August (1.11), September (1.09), October (1.07), November (1.05), December (0.97); P<0.001.

\*Percentage of GP Patient Survey respondents registered to the patient's general practice who were able to obtain a general practice appointment on their last attempt

**Appendix 4** Predicted probabilities of GP admission (versus A&E admission), by access to general practice and region of England, derived from a multivariable multilevel logistic regression model

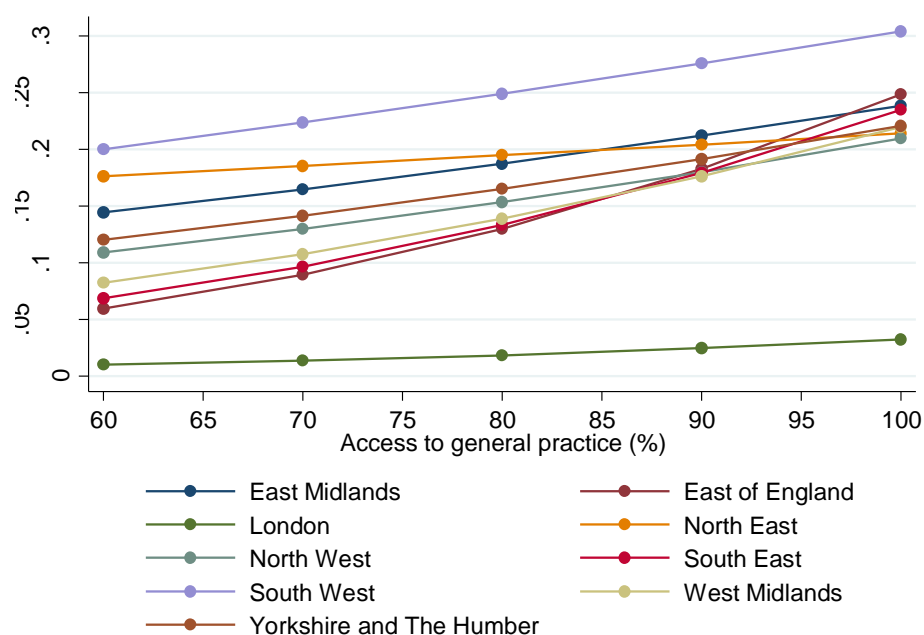

\*Percentage of GP Patient Survey respondents registered to the patient's general practice who were able to obtain a general practice appointment on their last attempt

The low probability of GP admission in London could be explained in part by differences in the configuration of urgent and emergency care services, patients' healthcare seeking behaviour, data coding, and the referral behaviours/pathways of GPs.

Supporting data:

| Region                   | Access to general practice (%) |      |      |      |      |
|--------------------------|--------------------------------|------|------|------|------|
|                          | 60                             | 70   | 80   | 90   | 100  |
| East Midlands            | 14.4                           | 16.5 | 18.7 | 21.2 | 23.8 |
| East of England          | 6.0                            | 8.9  | 13.0 | 18.3 | 24.8 |
| London                   | 1.0                            | 1.4  | 1.9  | 2.5  | 3.3  |
| North East               | 17.6                           | 18.5 | 19.5 | 20.4 | 21.4 |
| North West               | 10.9                           | 13.0 | 15.4 | 18.0 | 20.9 |
| South East               | 6.9                            | 9.7  | 13.3 | 17.9 | 23.5 |
| South West               | 20.0                           | 22.4 | 24.9 | 27.6 | 30.4 |
| West Midlands            | 8.2                            | 10.8 | 13.9 | 17.6 | 22.0 |
| Yorkshire and The Humber | 12.0                           | 14.1 | 16.5 | 19.1 | 22.1 |
